# Supplementary material
Source: Springer Nature journal article supplement (https://www.springermedizin.de/resource/supplementary/40345_2014_29_MOESM4_ESM.pdf/25658354)

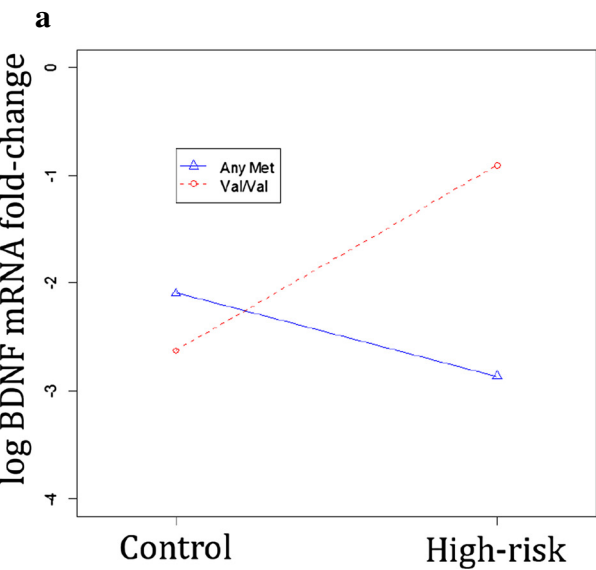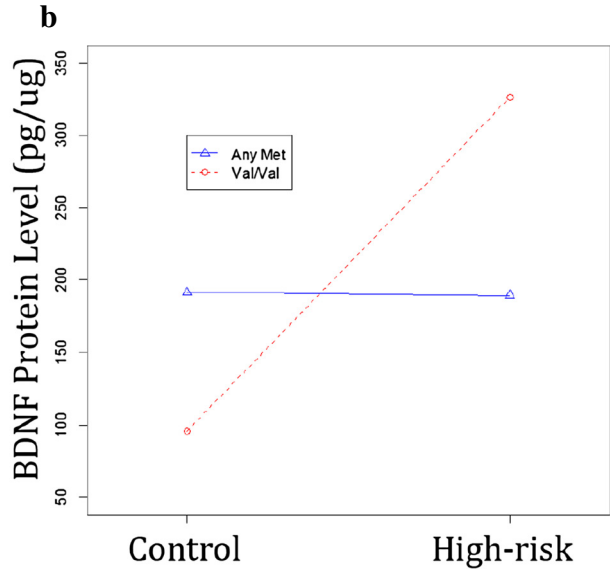

\*Estimates are adjusted for age, sex, SES and GAF

Supplement: MOESM4 [file 25658354]
